# Supplementary material
Source: MDPI journal article supplement (https://www.mdpi.com/1424-2818/13/2/97)
Supplement: s1 [file s1]

## Supplementary material

**File S1:** References for trait-trait and trait-environment relationships depicted in Figures 1 and 2:

- 1) Ackerly, D. D., C. A. Knight, S. B. Weiss, K. Barton, and K. P. Starmer. 2002. Leaf size, specific leaf area and microhabitat distribution of chaparral woody plants: contrasting patterns in species level and community level analyses. *Oecologia* 130:449-457.
- 2) Cach-Pérez Manuel, J., L. Andrade José, W. Cetzal-Ix, and C. Reyes-García. 2016. Environmental influence on the inter- and intraspecific variation in the density and morphology of stomata and trichomes of epiphytic bromeliads of the Yucatan Peninsula. *Botanical Journal of the Linnean Society* 181:441-458.
- 3) Casson, S., and J. E. Gray. 2008. Influence of environmental factors on stomatal development. *New Phytologist* 178:9-23.
- 4) Cornwell, W. K., and D. D. Ackerly. 2009. Community assembly and shifts in plant trait distributions across an environmental gradient in coastal California. *Ecological Monographs* 79:109-126.
- 5) Craine, J. M., A. J. Elmore, M. P. M. Aida, M. Bustamante, T. E. Dawson, E. A. Hobbie, A. Kahmen, M. C. Mack, K. K. McLauchlan, A. Michelsen, G. B. Nardoto, L. H. Pardo, J. Peñuelas, P. B. Reich, E. A. G. Schuur, W. D. Stock, P. H. Templer, R. A. Virginia, J. M. Welker, and I. J. Wright. 2009. Global patterns of foliar nitrogen isotopes and their relationships with climate, mycorrhizal fungi, foliar nutrient concentrations, and nitrogen availability. *New Phytologist* 183:980-992.
- 6) Cunningham, S. A., B. Summerhayes, and M. Westoby. 1999. Evolutionary divergences in leaf structure and chemistry, comparing rainfall and soil nutrient gradients. *Ecological Monographs* 69:569-588.
- 7) Díaz, S., J. Kattge, J. H. C. Cornelissen, I. J. Wright, S. Lavorel, S. Dray, B. Reu, M. Kleyer, C. Wirth, I. Colin Prentice, E. Garnier, G. Bönsch, M. Westoby, H. Poorter, P. B. Reich, A. T. Moles, J. Dickie, A. N. Gillison, A. E. Zanne, J. Chave, S. Joseph Wright, S. N. Sheremet'ev, H. Jactel, C. Baraloto, B. Cerabolini, S. Pierce, B. Shipley, D. Kirkup, F. Casanoves, J. S. Joswig, A. Günther, V. Falczuk, N. Rüger, M. D. Mahecha, and L. D. Gorné. 2016. The global spectrum of plant form and function. *Nature* 529:167-171.
- 8) Einzmann, H. J. R., N. Schickenberg, and G. Zotz. 2020. Variation in root morphology of epiphytic orchids along small-scale and large-scale moisture gradients. *Acta Botanica Brasiliica* 34:66-73.
- 9) Franks, P. J., and D. J. Beerling. 2009. Maximum leaf conductance driven by CO<sub>2</sub> effects on stomatal size and density over geologic time. *Proceedings of the National Academy of Sciences of the United States of America* 106:10343-10347.
- 10) Fyllas, N. M., S. Patiño, T. R. Baker, G. Bielefeld Nardoto, L. A. Martinelli, C. A. Quesada, R. Paiva, M. Schwarz, V. Horna, L. M. Mercado, A. Santos, L. Arroyo, E. M. Jiménez, F. J. Luizão, D. A. Neill, N. Silva, A. Prieto, A. Rudas, M. Silviera, I. C. G. Vieira, G. Lopez-Gonzalez, Y. Malhi, O. L. Phillips, and J. Lloyd. 2009. Basin-wide variations in foliar properties of Amazonian forest: phylogeny, soils and climate. *Biogeosciences* 6:2677-2708.
- 11) Givnish, T. J. 1987. Comparative studies of leaf form - Assessing the relative roles of selective pressures and phylogenetic constraints. *New Phytologist* 106:131-160.
- 12) Hietz, P., and O. Briones. 1998. Correlation between water relations and within-canopy distribution of epiphytic ferns in a Mexican cloud forest. *Oecologia* 114:305-316.
- 13) Jager, M. M., S. J. Richardson, P. J. Bellingham, M. J. Clearwater, and D. C. Laughlin. 2015. Soil fertility induces coordinated responses of multiple independent functional traits. *Journal of Ecology* 103:374-385.
- 14) Kerkhoff, A. J., W. F. Fagan, J. J. Elser, and B. J. Enquist. 2006. Phylogenetic and growth form variation in the scaling of nitrogen and phosphorus in the seed plants. *American Naturalist* 168:E103-E122.

- 15) Körner, C., J. A. Scheel, and H. Bauer. 1979. Maximum leaf diffusive conductance in vascular plants. *Photosynthetica* 13:45-82.
- 16) Loranger, J., and B. Shipley. 2010. Interspecific covariation between stomatal density and other functional leaf traits in a local flora. *Botany-Botanique* 88.
- 17) Ma, Z., D. Guo, X. Xu, M. Lu, R. D. Bardgett, D. M. Eissenstat, M. L. McCormack, and L. O. Hedin. 2018. Evolutionary history resolves global organization of root functional traits. *Nature* 555:94.
- 18) McDonald, P. G., C. R. Fonseca, J. M. Overton, and M. Westoby. 2003. Leaf-size divergence along rainfall and soil-nutrient gradients: is the method of size reduction common among clades? *Functional Ecology* 17:50-57.
- 19) Niinemets, Ü. 2001. Global-scale climatic controls of leaf dry mass per area, density, and thickness in trees and shrubs. *Ecology* 82:453-469.
- 20) Ordoñez, J. C., P. M. Van Bodegom, J.-P. M. Witte, I. J. Wright, P. B. Reich, and R. Aerts. 2009. A global study of relationships between leaf traits, climate and soil measures of nutrient fertility. *Global Ecology and Biogeography* 18:137-149.
- 21) Parkhurst, D. F., and O. L. Loucks. 1972. Optimal leaf size in relation to environment. *Journal of Ecology* 60:505-537.
- 22) Peppe, D. J., D. L. Royer, B. Cariglino, S. Y. Oliver, S. Newman, E. Leight, G. Enikolopov, M. Fernandez-Burgos, F. Herrera, J. M. Adams, E. Correa, E. D. Currano, J. M. Erickson, L. F. Hinojosa, J. W. Hoganson, A. Iglesias, C. A. Jaramillo, K. R. Johnson, G. J. Jordan, N. J. B. Kraft, E. C. Lovelock, C. H. Lusk, Ü. Niinemets, J. Peñuelas, G. Rapson, S. L. Wing, and I. J. Wright. 2011. Sensitivity of leaf size and shape to climate: global patterns and paleoclimatic applications. 190:724-739.
- 23) Pérez-Harguindeguy, N., S. Díaz, E. Garnier, S. Lavorel, H. Poorter, P. Jaureguiberry, M. S. Bret-Harte, W. K. Cornwell, J. M. Craine, D. E. Gurvich, C. Urcelay, E. J. Veneklaas, P. B. Reich, L. Poorter, I. J. Wright, P. Ray, L. Enrico, J. G. Pausas, A. C. de Vos, N. Buchmann, G. Funes, F. Quétier, J. G. Hodgson, K. Thompson, H. D. Morgan, H. ter Steege, M. G. A. van der Heijden, L. Sack, B. Blonder, P. Poschlod, M. V. Vaieretti, G. Conti, A. C. Staver, S. Aquino, and J. H. C. Cornelissen. 2013. New handbook for standardised measurement of plant functional traits worldwide. *Australian Journal of Botany* 61:167-234.
- 24) Petter, G., K. Wagner, W. Wanek, E. J. Sánchez Delgado, G. Zotz, J. S. Cabral, and H. Kreft. 2016. Functional leaf traits of vascular epiphytes: vertical trends within the forest, intra- and interspecific trait variability, and taxonomic signals. *Functional Ecology* 30:188-198.
- 25) Roumet, C., M. Birouste, C. Picon-Cochard, M. Ghestem, N. Osman, S. Vrignon-Brenas, K. f. Cao, and A. Stokes. 2016. Root structure–function relationships in 74 species: evidence of a root economics spectrum related to carbon economy. *New Phytologist* 210:815-826.
- 26) Smith, W. K., D. T. Bell, and K. A. Shepherd. 1998. Associations between leaf structure, orientation, and sunlight exposure in five Western Australian communities. *American Journal of Botany* 85:56-63.
- 27) Thompson, K., J. A. Parkinson, S. R. Band, and R. E. Spencer. 1997. A comparative study of leaf nutrient concentrations in a regional herbaceous flora. *New Phytologist* 136:679-689.
- 28) Valverde-Barrantes, O. J., K. A. Smemo, and C. B. Blackwood. 2015. Fine root morphology is phylogenetically structured, but nitrogen is related to the plant economics spectrum in temperate trees. 29:796-807.
- 29) Weemstra, M., L. Mommer, E. J. W. Visser, J. Ruijven, T. W. Kuyper, G. M. J. Mohren, and F. J. Sterck. 2016. Towards a multidimensional root trait framework: a tree root review. *New Phytologist* 211:1159-1169.
- 30) Wright, I. J., D. D. Ackerly, F. Bongers, K. E. Harms, G. Ibarra-Manriquez, M. Martinez-Ramos, S. J. Mazer, H. C. Muller-Landau, H. Paz, N. C. A. Pitman, L. Poorter, M. R. Silman, C. F. Vriesendorp, C. O. Webb, M. Westoby, and S. J. Wright. 2007. Relationships among ecologically important dimensions of plant trait variation in seven neotropical forests. *Ann Bot* 99:1003-1015.

- 
- 31) Wright, I. J., P. B. Reich, J. H. C. Cornelissen, D. S. Falster, E. Garnier, K. Hikosaka, B. B. Lamont, W. Lee, J. Oleksyn, N. Osada, H. Poorter, R. Villar, D. Warton, and M. Westoby. 2005. Assessing the generality of global leaf trait relationships.
  - 32) Wright, I. J., P. B. Reich, M. Westoby, D. D. Ackerly, Z. Baruch, F. Bongers, J. Cavender-Bares, T. Chapin, J. H. C. Cornelissen, M. Diemer, J. Flexas, E. Garnier, P. K. Groom, J. Gulias, K. Hikosaka, B. B. Lamont, T. Lee, W. Lee, C. Lusk, J. J. Midgley, M. L. Navas, Ü. Niinemets, J. Oleksyn, N. Osada, H. Poorter, P. Poot, L. Prior, V. I. Pyankov, C. Roumet, S. C. Thomas, M. G. Tjoelker, E. J. Veneklaas, and R. Villar. 2004. The worldwide leaf economics spectrum. *Nature* 428:821-827.
  - 33) Zotz, G. 2004. How prevalent is crassulacean acid metabolism among vascular epiphytes? *Oecologia* 138:184-192.

**Table S1:** Principal component analysis of functional traits. Eigenvalues, explained variation and trait loadings for first four principal components (PC1-4). “26 traits”: dataset with almost all continuous traits (not included was LChl). “14 traits”: dataset without root and stomatal traits to allow for the inclusion of species without observations on these traits.

|                         | 26 traits |       |       |       | 14 traits |       |       |       |
|-------------------------|-----------|-------|-------|-------|-----------|-------|-------|-------|
|                         | PC1       | PC2   | PC3   | PC4   | PC1       | PC2   | PC3   | PC4   |
| explained variation (%) | 26        | 18    | 12    | 9     | 28        | 22    | 14    | 9     |
| Eigenvalue              | 6.84      | 4.77  | 3.19  | 2.37  | 3.94      | 3.07  | 1.96  | 1.20  |
| Trait                   |           |       |       |       |           |       |       |       |
| Hmax                    | -0.19     | -0.30 | 0.71  | 0.24  | -0.35     | 0.38  | 0.79  | 0.05  |
| SLA                     | 0.50      | 0.54  | 0.08  | -0.37 | 0.78      | -0.43 | -0.14 | -0.19 |
| LDMC                    | -0.50     | -0.20 | 0.67  | -0.04 | -0.29     | -0.75 | 0.18  | 0.42  |
| Lth                     | -0.02     | -0.21 | -0.79 | 0.33  | -0.35     | 0.84  | -0.20 | -0.10 |
| LAmx                    | -0.07     | -0.19 | 0.77  | 0.30  | -0.23     | 0.33  | 0.82  | 0.22  |
| LCC                     | -0.58     | -0.41 | 0.05  | -0.43 | -0.64     | -0.39 | 0.08  | -0.34 |
| LNC                     | 0.66      | 0.22  | 0.35  | -0.42 | 0.78      | -0.28 | 0.24  | -0.22 |
| LPC                     | 0.76      | 0.31  | 0.07  | -0.10 | 0.77      | 0.27  | 0.16  | 0.03  |
| LKC                     | 0.70      | 0.46  | 0.08  | 0.24  | 0.64      | 0.46  | 0.20  | 0.15  |
| LMgC                    | 0.62      | -0.06 | -0.34 | 0.22  | 0.49      | 0.47  | -0.35 | 0.17  |
| LCaC                    | 0.46      | -0.28 | -0.33 | 0.13  | 0.16      | 0.65  | -0.16 | 0.12  |
| δ15N                    | 0.35      | 0.47  | 0.24  | -0.19 | 0.60      | -0.02 | 0.35  | -0.11 |
| δ13C                    | -0.32     | -0.25 | -0.49 | 0.35  | -0.55     | 0.42  | -0.31 | -0.12 |
| RCC                     | -0.57     | 0.48  | -0.17 | -0.15 | NA        | NA    | NA    | NA    |
| RNC                     | 0.81      | 0.14  | 0.08  | -0.21 | NA        | NA    | NA    | NA    |
| RPC                     | 0.79      | -0.28 | 0.01  | -0.15 | NA        | NA    | NA    | NA    |
| RKC                     | 0.75      | -0.55 | 0.01  | -0.03 | NA        | NA    | NA    | NA    |
| RMgC                    | 0.78      | -0.47 | -0.04 | 0.02  | NA        | NA    | NA    | NA    |
| RCaC                    | 0.67      | -0.18 | 0.16  | 0.31  | NA        | NA    | NA    | NA    |
| SD                      | -0.18     | -0.39 | -0.13 | -0.71 | NA        | NA    | NA    | NA    |
| SL                      | 0.21      | 0.51  | 0.37  | 0.56  | NA        | NA    | NA    | NA    |
| PSCA                    | -0.22     | 0.20  | 0.09  | -0.34 | NA        | NA    | NA    | NA    |
| SRL                     | 0.12      | 0.88  | -0.26 | -0.14 | NA        | NA    | NA    | NA    |
| RD                      | 0.13      | -0.93 | 0.19  | 0.02  | NA        | NA    | NA    | NA    |
| RTD                     | -0.50     | 0.63  | 0.10  | 0.28  | NA        | NA    | NA    | NA    |
| SSD                     | -0.02     | 0.11  | 0.02  | 0.29  | 0.03      | -0.19 | -0.26 | 0.82  |

**Table S2:** Principal component analysis of CWMs functional traits. Eigenvalues, explained variation and trait loadings for first four principal components (PC1-4) for crown and stem communities (see Materials and Methods).

|                         | Crown |       |       |       | Stem  |       |       |       |
|-------------------------|-------|-------|-------|-------|-------|-------|-------|-------|
|                         | PC1   | PC2   | PC3   | PC4   | PC1   | PC2   | PC3   | PC4   |
| explained variation (%) | 32    | 25    | 13    | 9     | 27    | 23    | 13    | 13    |
| Eigenvalue              | 8,88  | 7,08  | 3,76  | 2,63  | 7,49  | 6,56  | 3,77  | 3,51  |
| Trait                   |       |       |       |       |       |       |       |       |
| H <sub>max</sub>        | 0,19  | 0,28  | 0,63  | -0,22 | -0,08 | -0,42 | 0,65  | 0,41  |
| SLA                     | 0,41  | -0,69 | 0,08  | -0,10 | 0,75  | -0,23 | 0,14  | -0,08 |
| LDMC                    | 0,09  | -0,73 | 0,56  | -0,19 | 0,33  | -0,77 | 0,27  | 0,13  |
| L <sub>th</sub>         | -0,27 | 0,75  | -0,51 | 0,21  | -0,57 | 0,66  | -0,32 | -0,13 |
| LA <sub>max</sub>       | 0,28  | 0,43  | 0,78  | -0,24 | -0,25 | -0,08 | 0,83  | 0,15  |
| SPAD                    | 0,58  | -0,41 | 0,38  | -0,32 | 0,47  | 0,20  | 0,29  | -0,10 |
| LCC                     | -0,35 | -0,70 | -0,43 | -0,20 | 0,26  | -0,57 | -0,58 | -0,08 |
| LNC                     | 0,59  | -0,65 | -0,10 | -0,16 | 0,90  | -0,05 | -0,01 | 0,04  |
| LPC                     | 0,76  | 0,35  | 0,33  | 0,19  | 0,29  | 0,71  | 0,42  | -0,15 |
| LKC                     | 0,36  | 0,87  | 0,19  | 0,03  | -0,41 | 0,75  | 0,34  | -0,13 |
| LMgC                    | 0,73  | 0,45  | -0,14 | -0,03 | 0,17  | 0,49  | 0,19  | 0,43  |
| LCaC                    | 0,73  | -0,16 | 0,06  | 0,44  | 0,77  | 0,40  | 0,22  | -0,17 |
| δ <sup>15</sup> N       | 0,22  | -0,02 | 0,52  | 0,41  | 0,33  | 0,35  | 0,58  | -0,51 |
| δ <sup>13</sup> C       | -0,29 | 0,61  | -0,39 | -0,55 | -0,62 | 0,04  | -0,47 | 0,54  |
| ph_pathway_C3           | 0,19  | -0,46 | 0,17  | 0,71  | 0,58  | -0,01 | 0,37  | -0,59 |
| RCC                     | -0,61 | 0,30  | 0,25  | 0,44  | -0,32 | 0,07  | -0,25 | -0,69 |
| RNC                     | 0,66  | -0,16 | -0,33 | 0,36  | 0,55  | 0,53  | -0,40 | -0,24 |
| RPC                     | 0,62  | -0,02 | -0,61 | 0,24  | 0,42  | 0,68  | -0,46 | 0,16  |
| RKC                     | 0,95  | 0,10  | -0,18 | -0,01 | 0,65  | 0,68  | -0,01 | 0,18  |
| RMgC                    | 0,93  | 0,15  | -0,23 | 0,00  | 0,68  | 0,50  | -0,33 | 0,27  |
| RCaC                    | 0,74  | 0,45  | -0,06 | 0,17  | 0,09  | 0,79  | 0,15  | 0,34  |
| SD                      | 0,09  | -0,93 | -0,06 | 0,00  | 0,68  | -0,63 | -0,13 | -0,16 |
| SL                      | -0,08 | 0,86  | 0,38  | 0,10  | -0,64 | 0,61  | 0,41  | 0,10  |
| PSCA                    | -0,08 | -0,60 | 0,55  | 0,10  | 0,49  | -0,42 | 0,23  | -0,19 |
| SRL                     | -0,73 | -0,17 | -0,06 | 0,61  | -0,15 | 0,10  | -0,23 | -0,83 |
| RD                      | 0,86  | 0,06  | 0,00  | -0,43 | 0,57  | 0,02  | 0,04  | 0,70  |
| RTD                     | -0,82 | 0,28  | 0,31  | -0,06 | -0,84 | -0,17 | 0,30  | -0,20 |
| SSD                     | 0,55  | 0,21  | 0,13  | 0,28  | -0,10 | 0,52  | -0,13 | -0,24 |

**Table S3:** Results of ANOVAs and pairwise comparisons of CWMs of different traits on tree species for crown and trunk assemblages. “variances”: states whether variances were homogenous (“homo”,  $p > 0.05$ ) or heterogeneous (“hetero”,  $p < 0.05$ ) according to Bartlett’s test. In the first case, F- and p-values are the results of regular ANOVA, followed by Tukey’s test, in the second case the results of Welch’s ANOVA, followed by max-t tests for multiple comparisons. p-values for pairwise comparisons between tree species: A-B, A-C etc.; A: *Aspidosperma*, B: *Brosimum*, C: *Calophyllum*, M: *Manilkara*. **p-values < 0.05 are in bold.** PP\_C3 relates to the relative abundance of individuals belonging to C<sub>3</sub> species. For a full list of traits see Table 1.

| trait            | variances | crown |                  |                  |      |                 |                  |                  |                 | variances | trunk |             |      |      |      |      |             |      |
|------------------|-----------|-------|------------------|------------------|------|-----------------|------------------|------------------|-----------------|-----------|-------|-------------|------|------|------|------|-------------|------|
|                  |           | F     | p                | A-B              | A-C  | A-M             | B-C              | B-M              | C-M             |           | F     | p           | A-B  | A-C  | A-M  | B-C  | B-M         | C-M  |
| SLA              | homo      | 3.40  | <b>0.02</b>      | <b>0.04</b>      | 0.10 | 1.00            | 0.08             | 0.06             | 1.00            | homo      | 1.48  | 0.24        | 0.40 | 0.78 | 0.20 | 0.93 | 0.98        | 0.73 |
| LDMC             | hetero    | 5.37  | <b>&lt;0.01</b>  | <b>0.02</b>      | 0.73 | 0.81            | <b>0.001</b>     | 0.25             | 0.28            | homo      | 2.53  | 0.07        | 0.07 | 0.16 | 0.55 | 0.99 | 0.42        | 0.67 |
| L <sub>th</sub>  | hetero    | 6.65  | <b>&lt;0.01</b>  | <b>&lt;0.01</b>  | 0.89 | 0.56            | <b>&lt;0.001</b> | 0.12             | 0.17            | homo      | 2.09  | 0.12        | 0.09 | 0.31 | 0.17 | 0.93 | 0.96        | 0.99 |
| LA               | homo      | 6.88  | <b>&lt;0.001</b> | <b>0.02</b>      | 0.97 | <b>&lt;0.01</b> | 0.07             | 0.83             | <b>0.01</b>     | homo      | 0.17  | 0.92        | 0.97 | 0.91 | 0.99 | 0.99 | 0.99        | 0.96 |
| H <sub>max</sub> | hetero    | 4.89  | <b>&lt;0.01</b>  | 0.10             | 0.98 | <b>0.04</b>     | 0.05             | 0.88             | <b>0.02</b>     | homo      | 0.88  | 0.46        | 0.99 | 0.97 | 0.78 | 0.85 | 0.87        | 0.41 |
| LChl             | homo      | 9.78  | <b>&lt;0.001</b> | <b>&lt;0.001</b> | 1.00 | 0.40            | <b>&lt;0.001</b> | <b>0.01</b>      | 0.39            | homo      | 3.39  | <b>0.03</b> | 0.58 | 0.87 | 0.64 | 0.96 | <b>0.02</b> | 0.14 |
| LCC              | homo      | 1.30  | 0.28             | 0.92             | 1.00 | 0.35            | 0.88             | 0.72             | 0.32            | hetero    | 0.49  | 0.70        | 0.98 | 1.00 | 1.00 | 0.72 | 0.81        | 1.00 |
| RCC              | homo      | 4.20  | <b>0.01</b>      | <b>&lt;0.01</b>  | 0.47 | 0.35            | 0.23             | 0.26             | 1.00            | homo      | 1.27  | 0.30        | 0.40 | 0.86 | 0.30 | 0.85 | 1.00        | 0.76 |
| LNC              | homo      | 8.77  | <b>&lt;0.001</b> | <b>&lt;0.001</b> | 0.84 | 0.98            | <b>&lt;0.01</b>  | <b>&lt;0.001</b> | 0.96            | homo      | 3.01  | <b>0.04</b> | 0.06 | 0.99 | 0.48 | 0.09 | 0.46        | 0.62 |
| RNC              | hetero    | 7.11  | <b>&lt;0.01</b>  | <b>0.04</b>      | 0.08 | 1.00            | 0.76             | <b>&lt;0.01</b>  | <b>&lt;0.01</b> | homo      | 1.08  | 0.37        | 0.97 | 0.69 | 0.97 | 0.31 | 0.70        | 0.82 |
| LPC              | hetero    | 4.91  | <b>&lt;0.01</b>  | <b>0.02</b>      | 0.43 | <b>0.01</b>     | 0.21             | 0.91             | 0.23            | homo      | 1.91  | 0.14        | 0.80 | 0.62 | 1.00 | 0.10 | 0.53        | 0.59 |
| RPC              | homo      | 3.77  | <b>0.01</b>      | 0.10             | 0.18 | 0.98            | 1.00             | <b>0.04</b>      | 0.09            | homo      | 0.91  | 0.45        | 0.89 | 0.89 | 1.00 | 0.39 | 0.66        | 0.92 |
| LKC              | homo      | 2.51  | 0.06             | 0.80             | 0.63 | 0.04            | 0.99             | 0.27             | 0.51            | homo      | 1.22  | 0.31        | 0.65 | 0.28 | 0.87 | 0.85 | 0.94        | 0.52 |
| RKC              | homo      | 6.79  | <b>&lt;0.001</b> | <b>&lt;0.001</b> | 0.13 | 0.17            | 0.17             | 0.08             | 0.99            | homo      | 1.48  | 0.24        | 0.62 | 0.93 | 1.00 | 0.21 | 0.44        | 0.89 |
| LCaC             | hetero    | 3.61  | <b>0.02</b>      | 0.40             | 0.84 | 0.78            | <b>0.03</b>      | <b>0.01</b>      | 1.00            | hetero    | 1.62  | 0.23        | 0.46 | 1.00 | 1.00 | 0.58 | 0.13        | 0.99 |
| RCaC             | homo      | 1.86  | 0.14             | 0.24             | 0.61 | 0.14            | 0.94             | 0.99             | 0.82            | hetero    | 0.44  | 0.72        | 0.97 | 0.87 | 0.99 | 0.86 | 0.99        | 0.75 |
| LMgC             | homo      | 1.42  | 0.24             | 0.22             | 0.88 | 0.48            | 0.68             | 0.96             | 0.92            | hetero    | 0.18  | 0.91        | 0.90 | 0.92 | 0.88 | 1.00 | 1.00        | 1.00 |

---

|                         |        |       |         |         |      |         |         |      |      |        |      |      |      |      |      |      |      |      |
|-------------------------|--------|-------|---------|---------|------|---------|---------|------|------|--------|------|------|------|------|------|------|------|------|
| RMgC                    | homo   | 7.03  | < 0.001 | < 0.001 | 0.04 | 0.20    | 0.37    | 0.07 | 0.87 | hetero | 0.97 | 0.43 | 0.71 | 1.00 | 0.99 | 0.41 | 0.39 | 0.99 |
| SD                      | homo   | 2.94  | 0.04    | 0.37    | 1.00 | 0.56    | 0.33    | 0.02 | 0.69 | homo   | 1.47 | 0.24 | 0.23 | 0.58 | 0.88 | 0.92 | 0.44 | 0.88 |
| SL                      | homo   | 3.95  | 0.01    | 0.40    | 0.90 | 0.32    | 0.85    | 0.01 | 0.09 | homo   | 1.24 | 0.31 | 0.30 | 0.49 | 0.80 | 0.99 | 0.66 | 0.88 |
| PSCA                    | homo   | 2.17  | 0.10    | 0.77    | 0.39 | 1.00    | 0.06    | 0.72 | 0.43 | homo   | 1.94 | 0.14 | 0.26 | 0.97 | 1.00 | 0.44 | 0.14 | 0.98 |
| SRL                     | homo   | 12.45 | < 0.001 | < 0.001 | 0.03 | < 0.001 | 0.05    | 0.65 | 0.44 | hetero | 0.97 | 0.43 | 0.46 | 0.79 | 0.65 | 0.64 | 0.84 | 0.95 |
| RD                      | homo   | 14.03 | < 0.001 | < 0.001 | 0.01 | 0.001   | 0.03    | 0.13 | 0.90 | hetero | 1.94 | 0.16 | 0.27 | 0.85 | 0.65 | 0.22 | 0.29 | 0.89 |
| RTD                     | homo   | 7.22  | < 0.001 | < 0.001 | 0.06 | 0.77    | 0.42    | 0.01 | 0.36 | hetero | 1.27 | 0.32 | 0.41 | 0.97 | 0.89 | 0.42 | 0.34 | 0.98 |
| SSD                     | homo   | 1.88  | 0.14    | 0.13    | 0.96 | 0.96    | 0.37    | 0.32 | 1.00 | hetero | 2.72 | 0.08 | 0.38 | 0.23 | 0.94 | 0.76 | 0.18 | 0.12 |
| $\delta^{13}\text{C}$   | hetero | 3.30  | 0.03    | 0.86    | 0.78 | 0.22    | 0.41    | 0.02 | 0.94 | hetero | 0.36 | 0.79 | 0.86 | 0.97 | 1.00 | 0.99 | 0.77 | 0.94 |
| $\delta^{13}\text{C}_2$ | hetero | 8.83  | < 0.001 | 0.01    | 0.65 | 0.72    | < 0.001 | 0.09 | 0.05 | homo   | 1.10 | 0.36 | 0.59 | 0.99 | 0.87 | 0.37 | 0.90 | 0.69 |
| $\delta^{15}\text{N}$   | homo   | 0.95  | 0.42    | 0.86    | 0.79 | 1.00    | 0.34    | 0.79 | 0.86 | homo   | 0.51 | 0.68 | 0.83 | 0.63 | 0.75 | 0.97 | 1.00 | 0.98 |
| PP_C3                   | hetero | 4.14  | 0.01    | 1.00    | 1.00 | 1.00    | 0.18    | 0.05 | 0.12 | homo   | 0.72 | 0.55 | 1.00 | 1.00 | 0.78 | 1.00 | 0.65 | 0.64 |

---

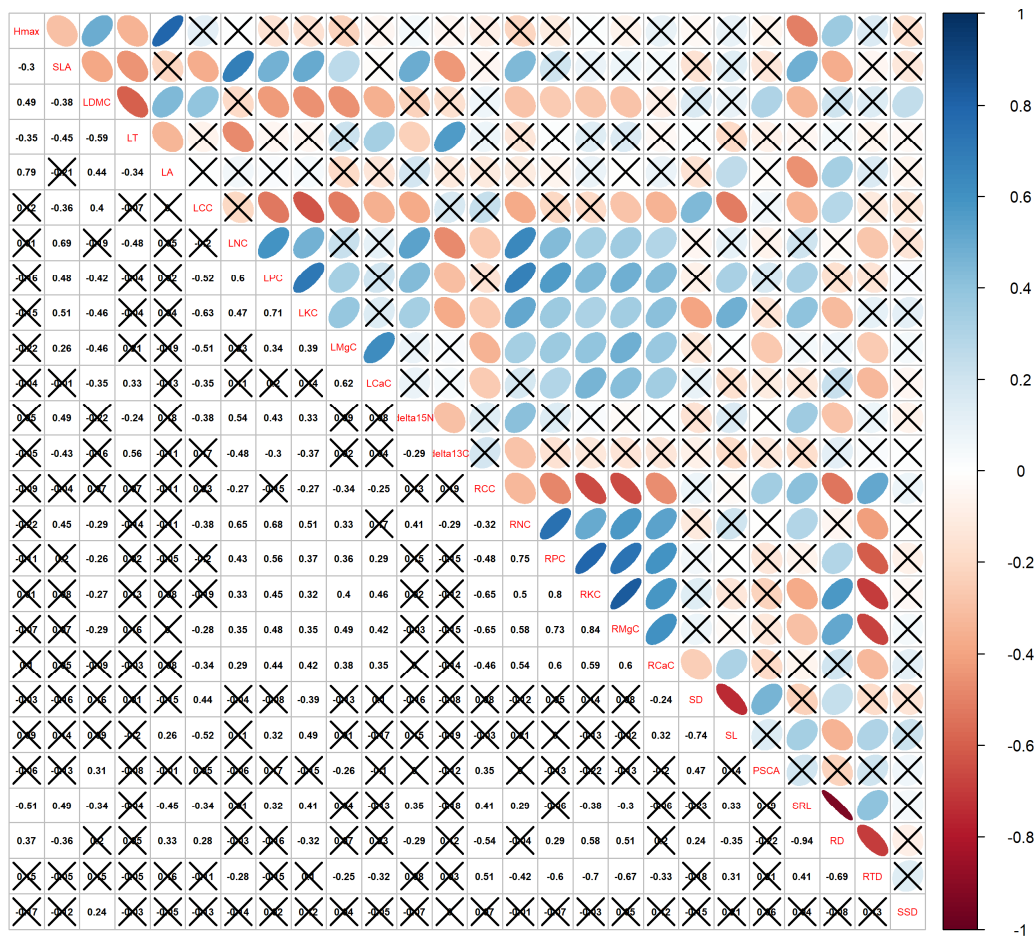

**Figure S1:** Correlation matrix for 26 traits. Pearson's correlation coefficients are given in the lower diagonal and are visually symbolized in the upper diagonal. Non-significant correlations ( $p > 0.05$ ) are crossed.

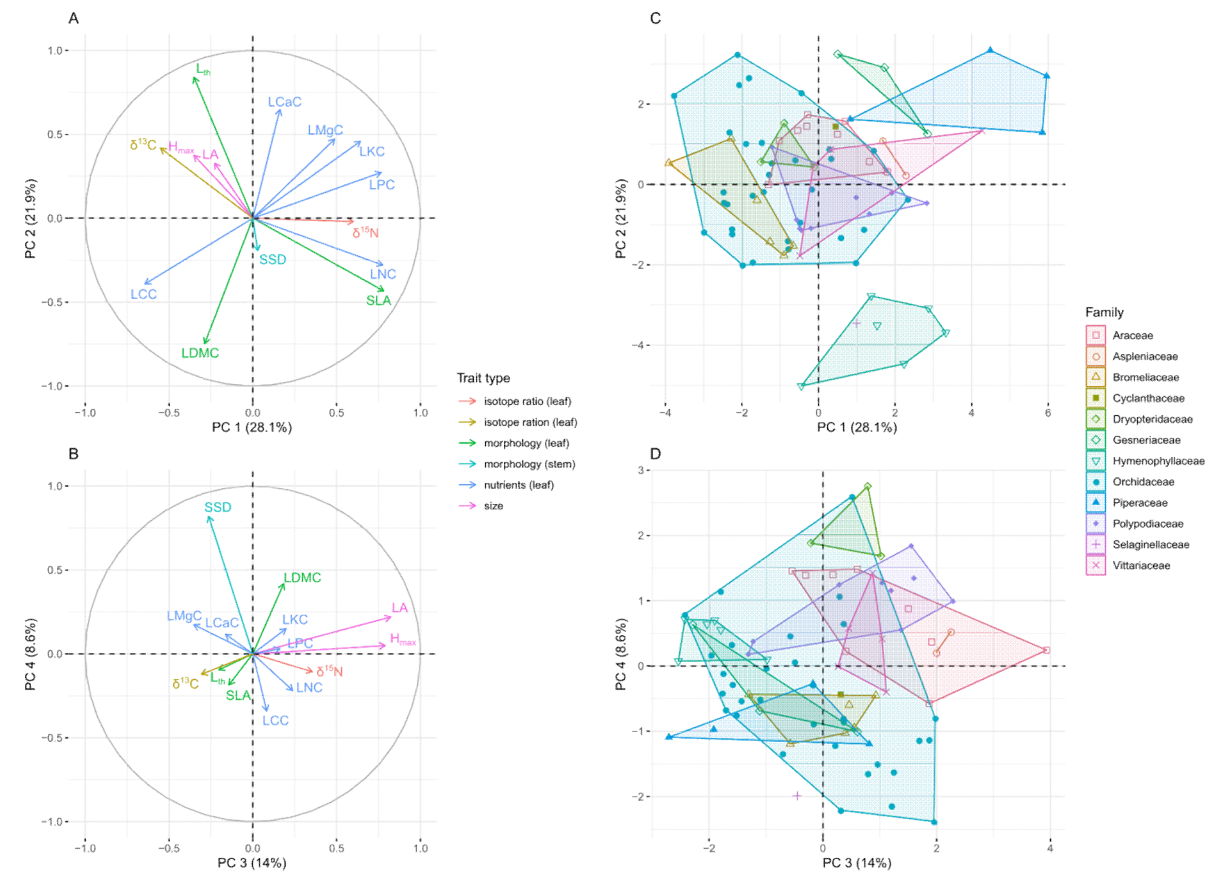

**Figure S2:** Principal component analysis of functional traits (excluding stomatal and root traits) of the epiphytic community at study site. Analysed were species averages for 13 functional traits of 81 epiphytic species (9 species not included in PCA for Figure 1). A and B: Variable correlation plots for the 1<sup>st</sup> and 2<sup>nd</sup> principal component (A) and the 3<sup>rd</sup> and 4<sup>th</sup> principal component (B), respectively. Colors refer to trait type. C and D: Epiphyte species within the ordination space. C: 1<sup>st</sup> and 2<sup>nd</sup> principal component, D: 3<sup>rd</sup> and 4<sup>th</sup> principal component. Plant families are differentiated by color and enclosed by convex hulls.

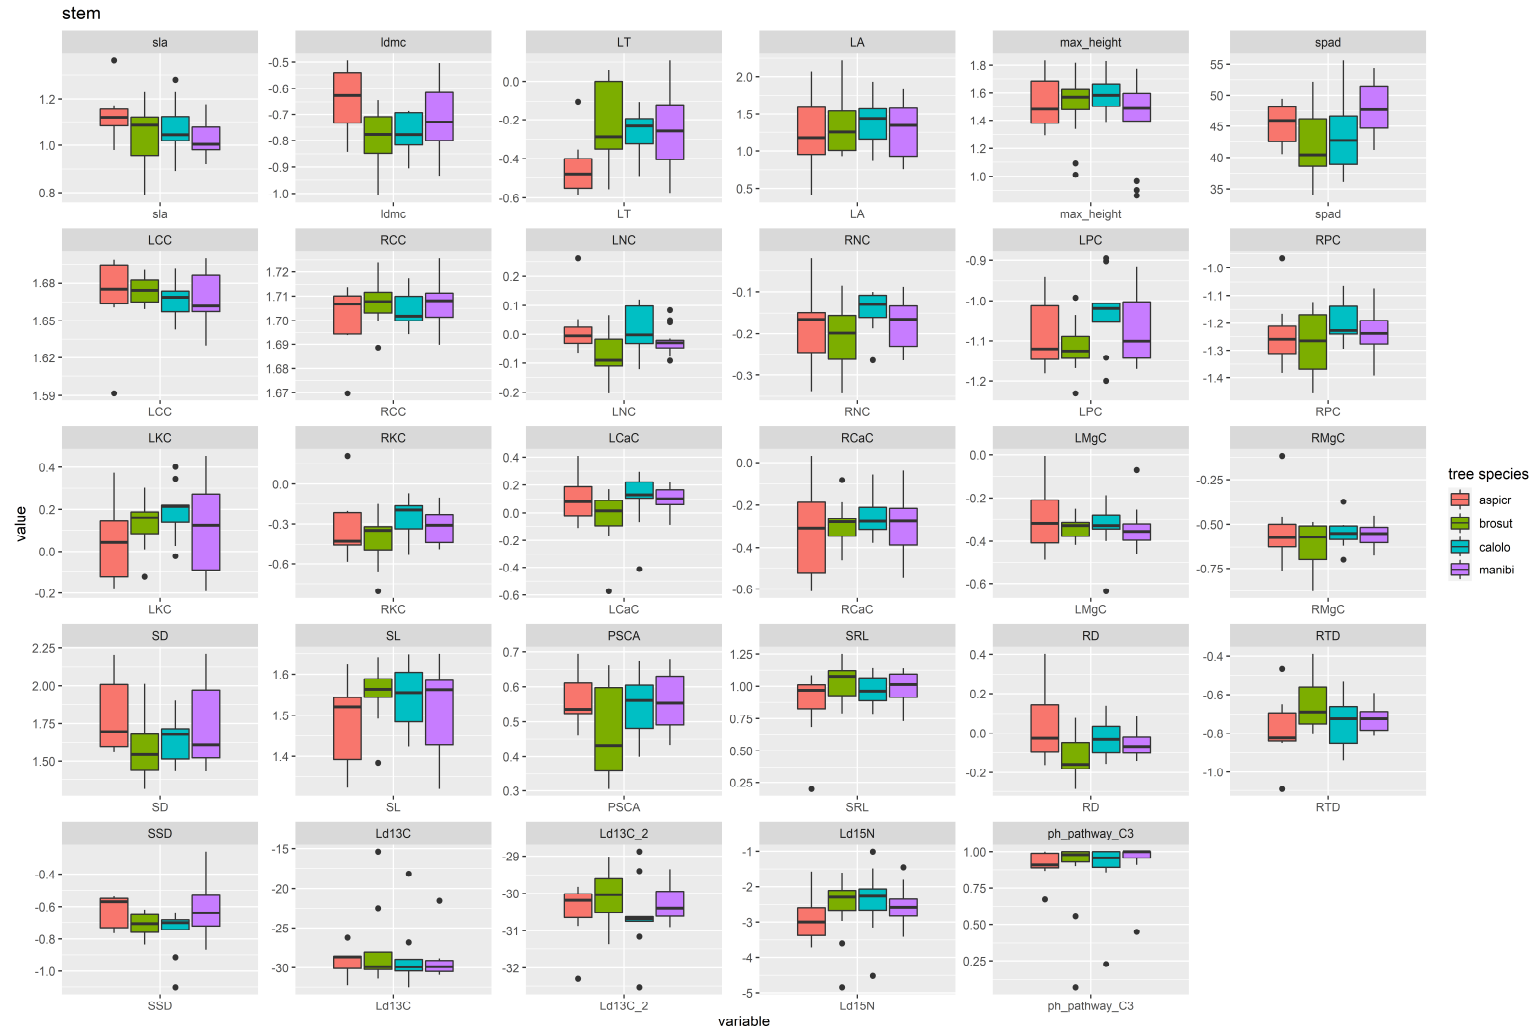

---

**Figure S3:** CWMs of different traits on stems of focal tree species. For units of trait values see table 1. Most traits were  $\log_{10}$ -transformed (see methods).  
“ $\delta^{13}\text{C}_2$ ” refers to CWMs based on  $\text{C}_3$  species only.

16

17

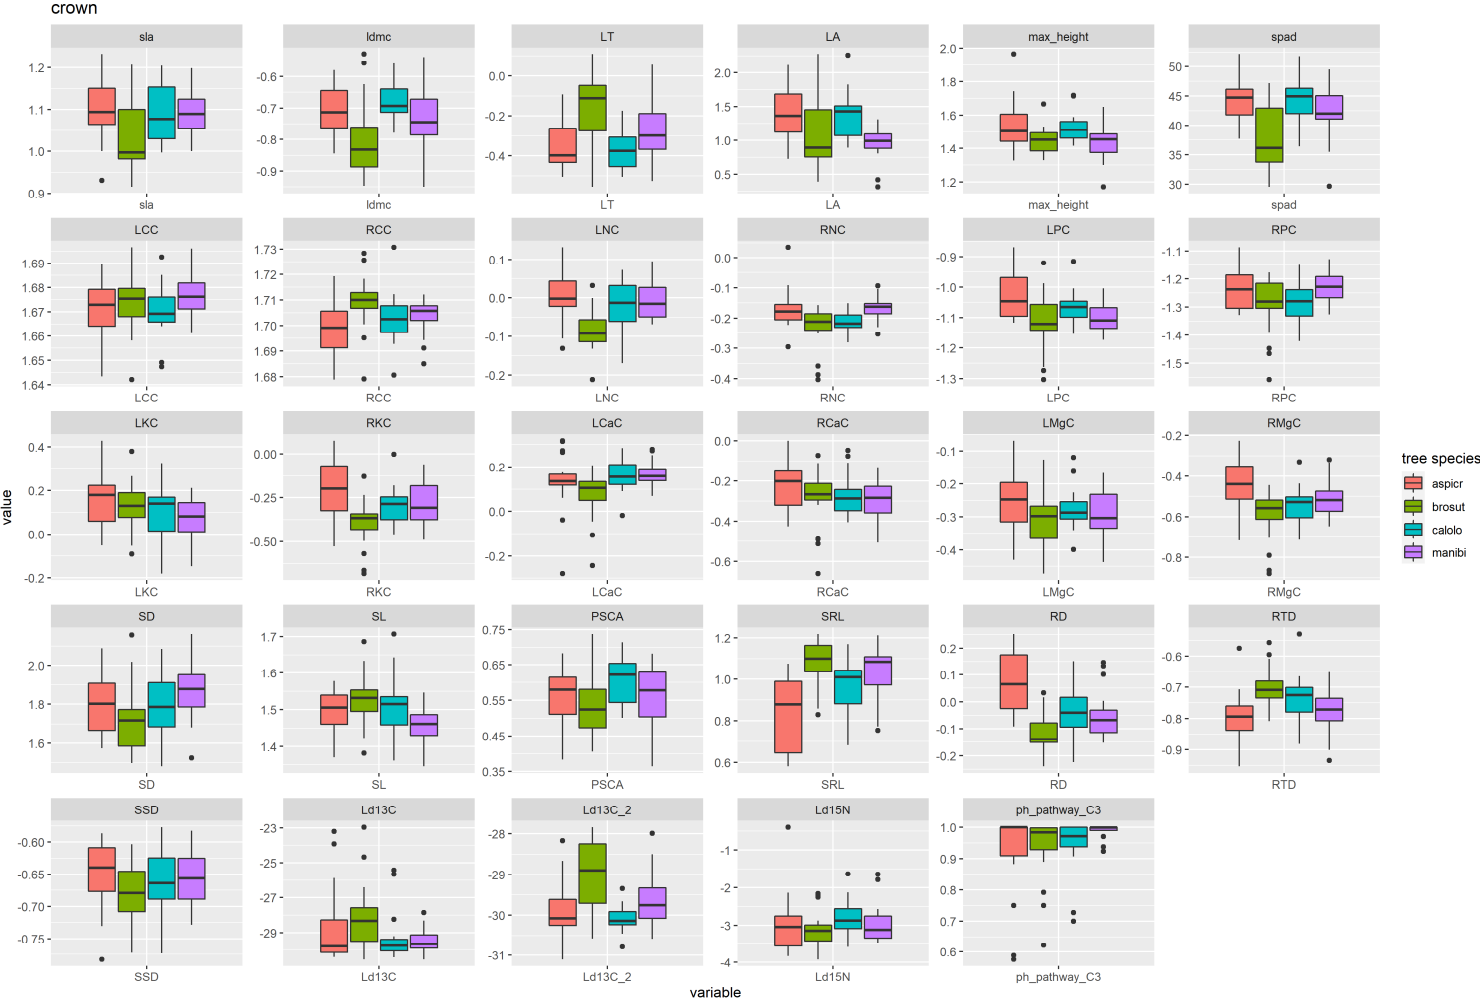

**Figure S4:** CWMs of different traits in crowns of focal tree species. For units of trait values see table 1. Most traits were log<sub>10</sub>-transformed (see methods). “ $\delta^{13}\text{C}_2$ ” refers to CWMs based on C<sub>3</sub> species only.

18  
19  
20
